# Supplementary material
Source: PubMed Central journal article supplement (PMC3603354)
Supplement: NIHMS451290-supplement-ESI.pdf [file NIHMS451290-supplement-ESI.pdf]

## Supporting Information

# Array-based Sensing of Metastatic Cells and Tissues Using Nanoparticle-Fluorescent Protein Conjugates

Subinoy Rana,<sup>†,§</sup> Arvind K. Singla,<sup>‡,§</sup> Avinash Bajaj,<sup>†,#</sup> S. Gokhan Elci,<sup>†</sup> Oscar R. Miranda,<sup>†</sup> Rubul Mout,<sup>†</sup> Bo Yan,<sup>†</sup> Frank R. Jirik,<sup>‡</sup> and Vincent M. Rotello<sup>†,\*</sup>

<sup>†</sup>Department of Chemistry, University of Massachusetts, Amherst, Massachusetts, USA.

<sup>‡</sup>Department of Biochemistry and Molecular Biology, The McCaig Institute for Bone and Joint Health, University of Calgary, Calgary, Alberta, Canada.

<sup>#</sup>Regional Centre for Biotechnology, Gurgaon, Haryana, India.

<sup>§</sup>These authors contributed equally.

\* Correspondence should be addressed to V.R. (rotello@chem.umass.edu)

## **Table of contents**

|                                                            |     |
|------------------------------------------------------------|-----|
| 1. Nanoparticle synthesis and characterizations            | S3  |
| 2. Expression of GFP and spectral characterization         | S9  |
| 3. Fluorescence titrations                                 | S11 |
| 4. Histopathology of the metastases                        | S12 |
| 5. Fluorescence response data                              | S13 |
| 6. Description of linear discriminant analysis             | S16 |
| 7. Jackknifed analyses of the fluorescence responses       | S20 |
| 8. Identification of unknown samples                       | S24 |
| 9. Three-dimensional LDA plot for normal and tumor tissues | S26 |

# 1. Nanoparticle synthesis

## (a) Ligand synthesis

Scheme 1:

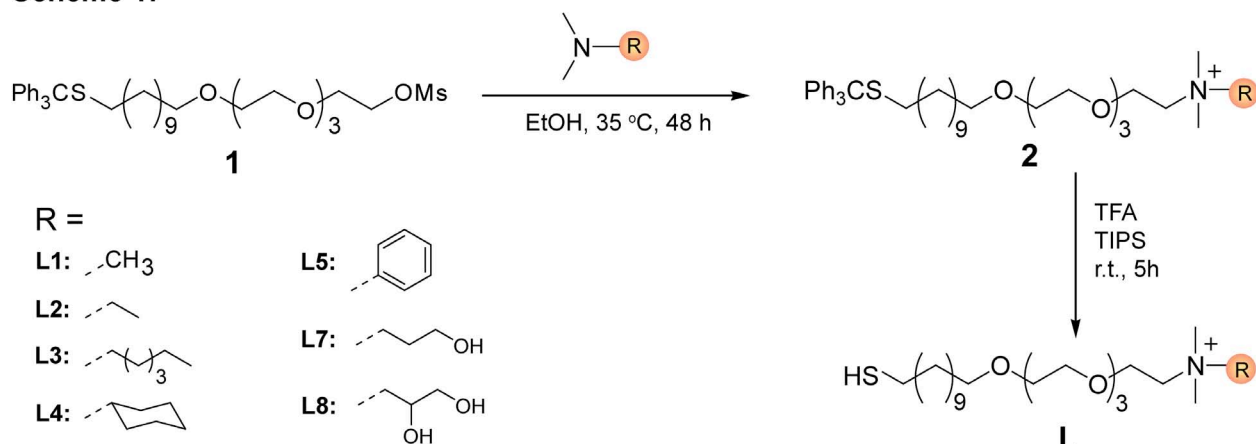

**General procedure:** The starting compound for functionalization with various headgroups was the compound **1**, synthesized according to reported procedure.<sup>1</sup> Compound **2** bearing quaternary ammonium headgroups were synthesized by the reaction of compound **1** with corresponding substituted N,N-dimethylamines for 48 hours at 35 °C. The trityl protected thiol compound **2** was dissolved in dry dichloromethane (DCM) and an excess of trifluoroacetic acid (TFA, 20 equivalents) was added. The color of the solution turned into yellow immediately. Subsequently, triisopropylsilane (TIPS, 1.2 equivalents) was added to the reaction mixture. The reaction mixture was stirred for 5 h under Ar-atmosphere at room temperature. After evaporating the solvent, the pale yellow residue was further dried in high vacuum and characterized by NMR.

Compound **L1**: <sup>1</sup>H NMR (400MHz, CDCl<sub>3</sub>, TMS): δ 3.95 (br, 2H, -CH<sub>2</sub>N-), 3.70-3.58 (m, 14H, -CH<sub>2</sub>O- + -OCH<sub>2</sub>-(CH<sub>2</sub>N)-), 3.49 (t, 2H, -CH<sub>2</sub>O-), 3.25 (s, 9H, -N(CH<sub>3</sub>)<sub>3</sub>-), 2.90 (s, 3H, -CH<sub>3</sub>SO<sub>3</sub><sup>-</sup>), 2.52 (q, 2H, -CH<sub>2</sub>S-), 1.64-1.51 (m, 4H, (SCH<sub>2</sub>)CH<sub>2</sub> + -CH<sub>2</sub>(CH<sub>2</sub>O)-), 1.36-1.22 (m, 15H, -SH + -CH<sub>2</sub>-).

Compound **L2**: <sup>1</sup>H NMR (400MHz, CDCl<sub>3</sub>, TMS): δ 3.95 (br, 2H, -CH<sub>2</sub>N-), 3.70-3.60 (m, 14H, -CH<sub>2</sub>O- + -OCH<sub>2</sub>-(CH<sub>2</sub>N)-), 3.57 (q, 2H, -N(CH<sub>3</sub>)<sub>2</sub>-CH<sub>2</sub>-CH<sub>3</sub>), 3.42 (t, 2H, -CH<sub>2</sub>-CH<sub>2</sub>O-), 3.20

(s, 6H, -N(CH<sub>3</sub>)<sub>2</sub>-), 2.52 (q, 2H, -CH<sub>2</sub>S-), 1.68-1.25 (m, 22H, -(SCH<sub>2</sub>)CH<sub>2</sub>- + -N(CH<sub>3</sub>)<sub>2</sub>-CH<sub>2</sub>-CH<sub>3</sub> + SH).

Compound **L3**: <sup>1</sup>H NMR (400MHz, CDCl<sub>3</sub>, TMS): δ 3.95 (br, 2H, -CH<sub>2</sub>N-), 3.68-3.56 (m, 14H, -CH<sub>2</sub>O- + -OCH<sub>2</sub>-(CH<sub>2</sub>N)-), 3.46 (t, 2H, -CH<sub>2</sub>O-), 3.40-3.33 (m, 2H, -NCH<sub>2</sub>-), 3.19 (s, 6H, -(CH<sub>3</sub>)<sub>2</sub>N-), 2.87 (s, 3H, -CH<sub>3</sub>SO<sub>3</sub><sup>-</sup>-), 2.52 (q, 2H, -CH<sub>2</sub>S-), 1.76-1.53 (m, 6H, -(NCH<sub>2</sub>)CH<sub>2</sub>-) + (SCH<sub>2</sub>)CH<sub>2</sub> + -CH<sub>2</sub>(CH<sub>2</sub>O)-, 1.41-1.22 (m, 21H, -SH + -(NCH<sub>2</sub>CH<sub>2</sub>-)CH<sub>2</sub>-) + -CH<sub>2</sub>-), 0.89 (t, 3H, -CH<sub>3</sub>-).

Compound **L4**: <sup>1</sup>H NMR (400MHz, CDCl<sub>3</sub>, TMS): δ 3.95 (br, 2H, -CH<sub>2</sub>N-), 3.81-3.72 (m, 1H, H<sub>Cyclo</sub>), 3.69-3.53 (m, 14H, -CH<sub>2</sub>O- + -OCH<sub>2</sub>-(CH<sub>2</sub>N)-), 3.49 (t, 2H, -CH<sub>2</sub>O-), 3.11 (s, 6H, -(CH<sub>3</sub>)<sub>2</sub>N-), 2.91 (s, 3H, -CH<sub>3</sub>SO<sub>3</sub><sup>-</sup>-), 2.52 (q, 2H, -CH<sub>2</sub>S-), 2.23 (d, 2H, H<sub>Cyclo</sub>), 1.99 (d, 2H, H<sub>Cyclo</sub>), 1.78-1.52 (m, 4H, -(SCH<sub>2</sub>)CH<sub>2</sub> + -CH<sub>2</sub>(CH<sub>2</sub>O)-), 1.51-1.12 (m, 21H, SH + -CH<sub>2</sub>- + H<sub>Cyclo</sub>).

Compound **L5**: <sup>1</sup>H NMR (400MHz, CDCl<sub>3</sub>, TMS): δ 7.82 (d, 2H, H<sub>Ar</sub>), 7.66-7.51 (m, 3H, H<sub>Ar</sub>), 4.24 (br, 2H, -CH<sub>2</sub>N-), 3.78 (s, 6H, -(CH<sub>3</sub>)<sub>2</sub>N-), 3.68-3.52 (m, 14H, -CH<sub>2</sub>O- + -OCH<sub>2</sub>-(CH<sub>2</sub>N)-), 3.47-3.36 (m, 2H, -CH<sub>2</sub>O-), 2.87 (s, 3H, -CH<sub>3</sub>SO<sub>3</sub><sup>-</sup>-), 2.52 (q, 2H, -CH<sub>2</sub>S-), 1.70-1.46 (m, 4H, -(SCH<sub>2</sub>)CH<sub>2</sub> + -CH<sub>2</sub>(CH<sub>2</sub>O)-), 1.42-1.16 (m, 15H, -SH + -CH<sub>2</sub>-).

Compound **L7**: <sup>1</sup>H NMR (400MHz, CDCl<sub>3</sub>, TMS): δ 3.94 (br, 2H, -CH<sub>2</sub>N-), 3.75-3.52 (m, 16H, -CH<sub>2</sub>O- + -OCH<sub>2</sub>-(CH<sub>2</sub>N)- + -CH<sub>2</sub>-OH), 3.48 (t, 2H, -CH<sub>2</sub>O-), 3.39-3.31 (m, 2H, -NCH<sub>2</sub>-), 3.25 (s, 6H, -(CH<sub>3</sub>)<sub>2</sub>N-), 3.2 (br, 1H, -OH), 2.89 (s, 3H, -CH<sub>3</sub>SO<sub>3</sub><sup>-</sup>-), 2.52 (q, 2H, -CH<sub>2</sub>S-), 2.35-2.26 (m, 2H, -(NCH<sub>2</sub>)CH<sub>2</sub>-), 1.70-1.52 (m, 4H, + (SCH<sub>2</sub>)CH<sub>2</sub> + -CH<sub>2</sub>(CH<sub>2</sub>O)-), 1.36-1.21 (m, 15H, -SH + -CH<sub>2</sub>-).

Compound **L8**: <sup>1</sup>H NMR (400MHz, CDCl<sub>3</sub>, TMS): δ 4.78 (br, 1H, -CHOH(CH<sub>2</sub>OH)-), 4.59 (br, 1H, -CH<sub>2</sub>OH-), 4.50-4.45 (m, 1H, -CHOH(CH<sub>2</sub>OH)-), 4.43 (d and br, 2H, -NCH<sub>2</sub>-), 3.95 (d and br, 2H, -CH<sub>2</sub>N-), 3.86-3.76 (d and br, 2H, -CH<sub>2</sub>-OH), 3.75-3.55 (m, 14H, -CH<sub>2</sub>O- + -OCH<sub>2</sub>-(CH<sub>2</sub>N)-), 3.48 (t, 2H, -CH<sub>2</sub>O-), 3.34 (s, 6H, -(CH<sub>3</sub>)<sub>2</sub>N-), 2.99 (s, 3H, -CH<sub>3</sub>SO<sub>3</sub><sup>-</sup>-), 2.52 (q, 2H, -CH<sub>2</sub>S-), 1.71-1.51 (m, 4H, + (SCH<sub>2</sub>)CH<sub>2</sub> + -CH<sub>2</sub>(CH<sub>2</sub>O)-), 1.42-1.21 (m, 15H, -SH + -CH<sub>2</sub>-).

## Scheme 2:

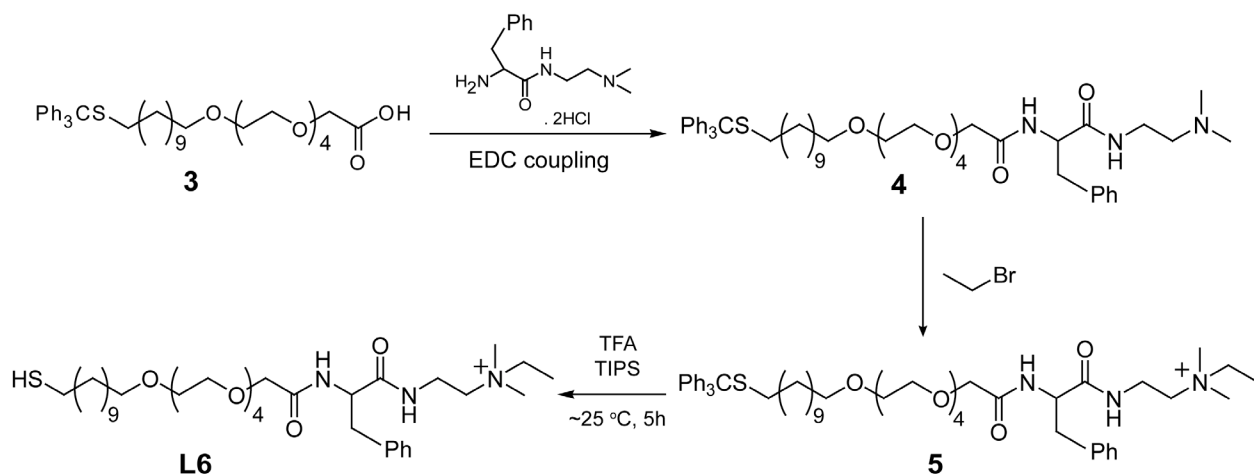

**Procedure:** Compound **4** bearing L-Phe group was synthesized through the reaction of compound **3** with corresponding 2-amino-N-(2-(dimethylamino)ethyl)-3-phenylpropanamide using EDC [1-Ethyl-3-(3-dimethylaminopropyl)carbodiimide] as the coupling agent. The reaction was done in a mixture of dichloromethane (DCM) and N, N-dimethylformamide. After 2 days, the solution was poured into ethyl acetate (EtOAc) and water. The organic layer was washed with brine, and dried with Na<sub>2</sub>SO<sub>4</sub>. The crude product was purified on silica column using EtOAc/MeOH (90:10) and EtOAc/MeOH/NH<sub>4</sub>OH (90:10:1) as gradient eluent. Compound **5** was obtained through nucleophilic substitution of compound **4** with bromoethane. Next, the trityl protection of the compound **5** was removed following the above mentioned procedure.

Compound **L6**: <sup>1</sup>H NMR (400MHz, CDCl<sub>3</sub>, TMS): δ 8.47 (s, 1H, -NH(CH)-), 7.65 (s, 1H, -NH(CH<sub>2</sub>)-), 7.29 (d of d, 1H, H<sub>Ar</sub>), 7.23 (d of d, 1H, H<sub>Ar</sub>), 4.62-4.59 (m, 1H, -NH(CH)-), 4.11-3.94 (m, 2H, -NH(CH<sub>2</sub>)-), 3.76-3.51 (m, 20H, -CH<sub>2</sub>O- + -CH<sub>2</sub>(NCH<sub>3</sub>)<sub>2</sub>- + -(NCH<sub>3</sub>)<sub>2</sub>CH<sub>2</sub>), 3.47 (t, 2H, -CH<sub>2</sub>O-), 3.23 (d of d, 2H, -CH-CH<sub>2</sub>-Ar), 3.10 (s, 6H, -(CH<sub>3</sub>)<sub>2</sub>N-), 2.9 (s, 2H, -OCH<sub>2</sub>C=O-), 2.52 (q, 2H, -CH<sub>2</sub>S-), 1.60-1.52 (m, 4H, -(SCH<sub>2</sub>)CH<sub>2</sub> + -CH<sub>2</sub>(CH<sub>2</sub>O)-), 1.41-1.15 (m, 18H, -CH<sub>3</sub> + -SH + -CH<sub>2</sub>-).

## (b) Nanoparticle synthesis

**Scheme 3:**

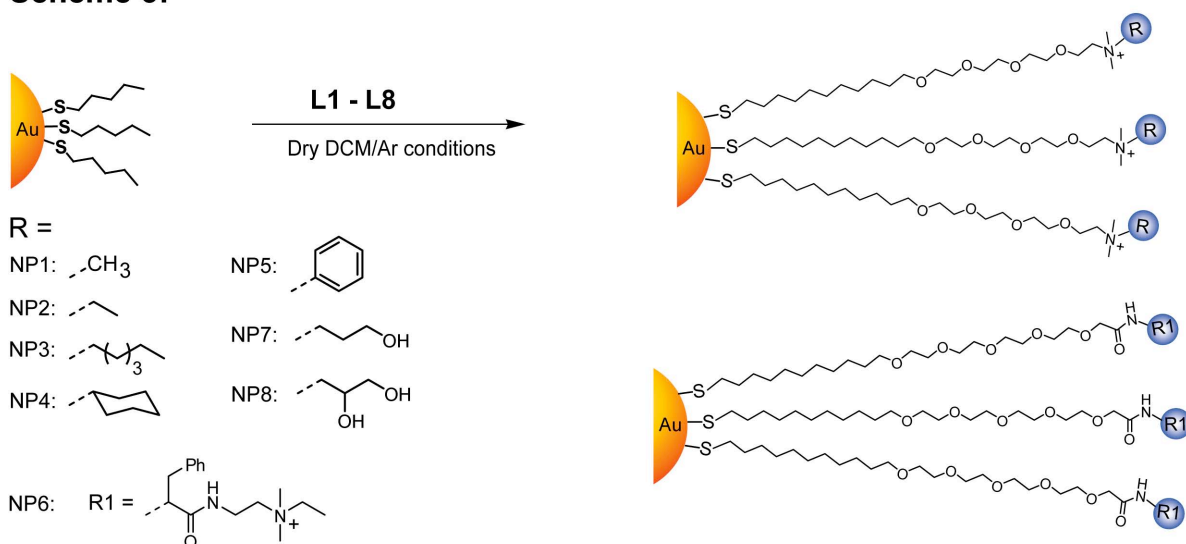

**General procedure:** 1-Pentanethiol coated gold nanoparticles ( $d = \sim 2$  nm) were prepared according to the previously reported protocol.<sup>2</sup> Place-exchange reaction<sup>3</sup> of compound **Ln** ( $n = 1 - 8$ ) dissolved in DCM with pentanethiol-coated gold nanoparticles ( $d = \sim 2$  nm) was carried out for 3 days at environmental temperature. Then, DCM was evaporated under reduced pressure. The residue was dissolved in a small amount of distilled water and dialyzed (membrane MWCO = 1,000) to remove excess ligands, acetic acid and the other salts present with the nanoparticles. After dialysis, the particles were lyophilized and subsequently redispersed in deionized water (18 M $\Omega$ -cm). <sup>1</sup>H NMR spectra in D<sub>2</sub>O showed substantial broadening of the proton signals and no free ligands were observed. Ligands on the nanoparticles were further characterized by mass spectrometry as described below.

*Laser Desorption/Ionization Mass Spectrometry (LDI-MS):* The LDI-MS characterization of these NPs was performed following the reported method<sup>4</sup> on a Bruker Autoflex III mass spectrometer (Bruker Daltonics, Bremen, Germany) (Autoflex III). Operating conditions were as follows: ion source 1 = 19.00 kV, ion source 2 = 16.60 kV, lens voltage = 8.44 kV, reflector voltage = 20.00 kV, reflector voltage 2 = 9.69 kV, pulsed ion extraction time = 10 ns, suppression = 100 Da, and positive mode. The LDI mass spectra showed the fragmentation patterns of NP1 – 5, 7, and 8 that were consistent with previously published results. The

molecular ions ( $MH^+$ ), major fragments ( $[MH-H_2S]^+$ ), and gold cluster ions ( $Au_2^+$  and  $Au_3^+$ ) were observed. The LDI-MS spectra for the NPs are presented below:

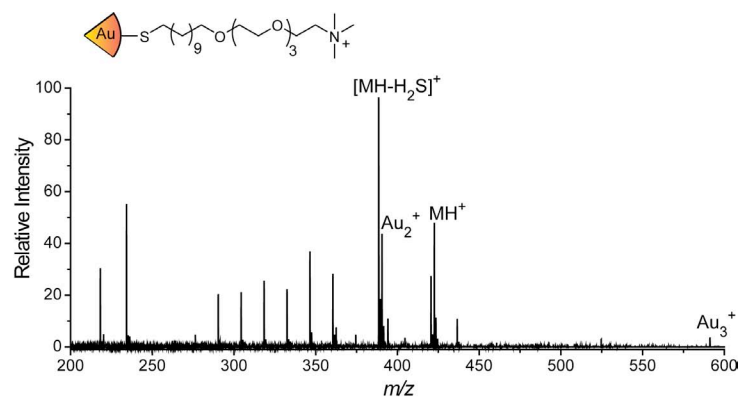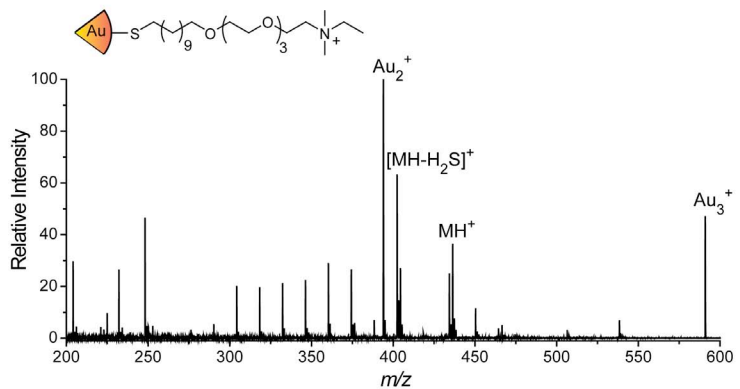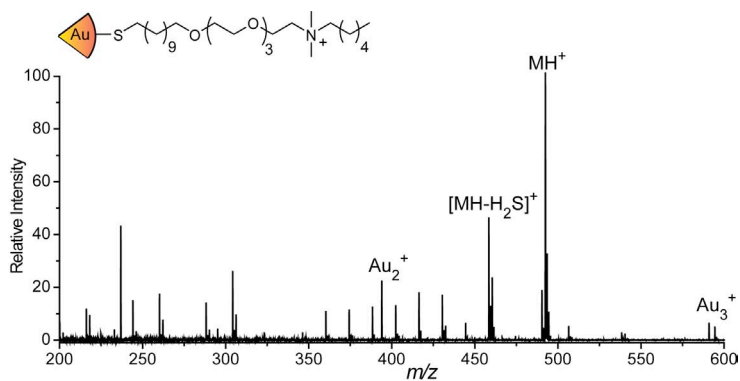





The surface ligand on NP6 has a larger molecular weight and is easier to get fragmented under LDI-MS conditions. Thus, a softer ionization method, such as matrix assisted LDI-MS (MALDI-MS) has been performed. A saturated  $\alpha$ -CHCA stock solution was prepared in 70% acetonitrile and 30% H<sub>2</sub>O. An equal volume of NP6 solution was added to the matrix stock solution. 2.5  $\mu$ L of this mixture was applied to the sample carrier, and then the MALDI-MS analysis was performed. The molecular ion ( $MH^+$ ,  $m/z = 685$ ) has been readily observed in the mass spectrum. The MALDI-MS spectrum is as follows:

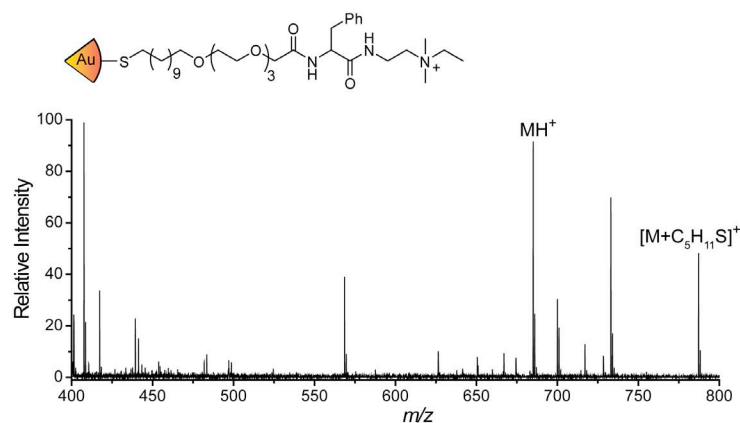

## 2) Expression of GFP and spectral characterization.

Green fluorescence protein (GFP) was expressed according to the known procedure.<sup>5</sup> Briefly, starter cultures from a glycerol stock of GFP [enhanced GFP (EGFP) was cloned into the pET21d vector (Novagen) where 6 $\times$ His tag is located at C-terminus] in BL21(DE3) was grown overnight in 50 ml of 2 $\times$ YT culture media (16 g tryptone, 10 g yeast extract, 5 g NaCl in 1 L water) with 50  $\mu$ L of 100 mg/mL ampicillin at a final concentration of 100  $\mu$ g/mL. The cultures were shaken overnight at 250 rpm at 37  $^{\circ}$ C. On the following day, 5 ml of the starter cultures was added to a Fernbach flask containing 1 L of 2 $\times$ YT and 1 ml 1000x ampicillin; and flask was shaken until the OD<sub>600</sub> reaches  $\sim$ 0.6. The culture was then induced by adding Isopropyl  $\beta$ -D-1-thiogalactopyranoside (IPTG, 1 mM final concentration) and shaken at 28  $^{\circ}$ C. After three hours, the cells were harvested by centrifugation (5000 rpm for 15 minutes at 4  $^{\circ}$ C). The pellet was then

resuspended in lysis buffer (2 mM Imidazole, 50 mM NaH<sub>2</sub>PO<sub>4</sub>, 300 mM NaCl). The cells were lysed using a microfluidizer and once lysed, the solution was spun down at 15000 rpm for 45 minutes at 4 °C. The supernatant was further purified using HisPur Cobalt columns from Pierce (cat. Number 89969) followed by dialysis in 5 mM sodium phosphate buffer (pH 7.4).

The absorbance and emission spectra (at  $\lambda_{exc.} = 475$  nm) of EGFP is shown below:

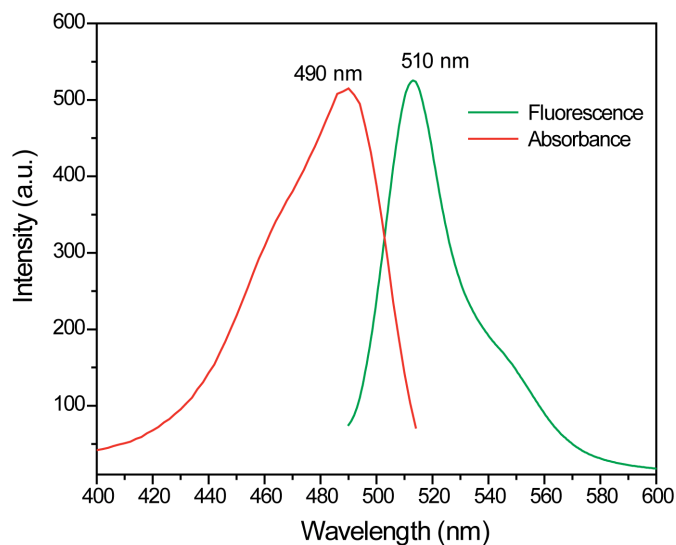

**Figure S1.** Absorbance and fluorescence spectra of GFP in 5 mM sodium phosphate buffer at pH 7.40.



**Table S1.** Binding constant ( $K_a$ ), and binding stoichiometry ( $n$ , GFP/NP) between GFP and cationic nanoparticles (NP1 – NP8) as determined from the fluorescence titrations.

| Nanoparticle | $K_a$ ( $10^9 \text{ M}^{-1}$ ) | $n$ |
|--------------|---------------------------------|-----|
| NP1          | 3.41                            | 1.3 |
| NP2          | 4.03                            | 3.6 |
| NP3          | 6.8                             | 4.6 |
| NP4          | 5.99                            | 1.9 |
| NP5          | 3.77                            | 2.1 |
| NP6          | 18.6                            | 1.6 |
| NP7          | 1.53                            | 1.1 |
| NP8          | 0.37                            | 2.5 |

#### 4. Histopathology of the metastases

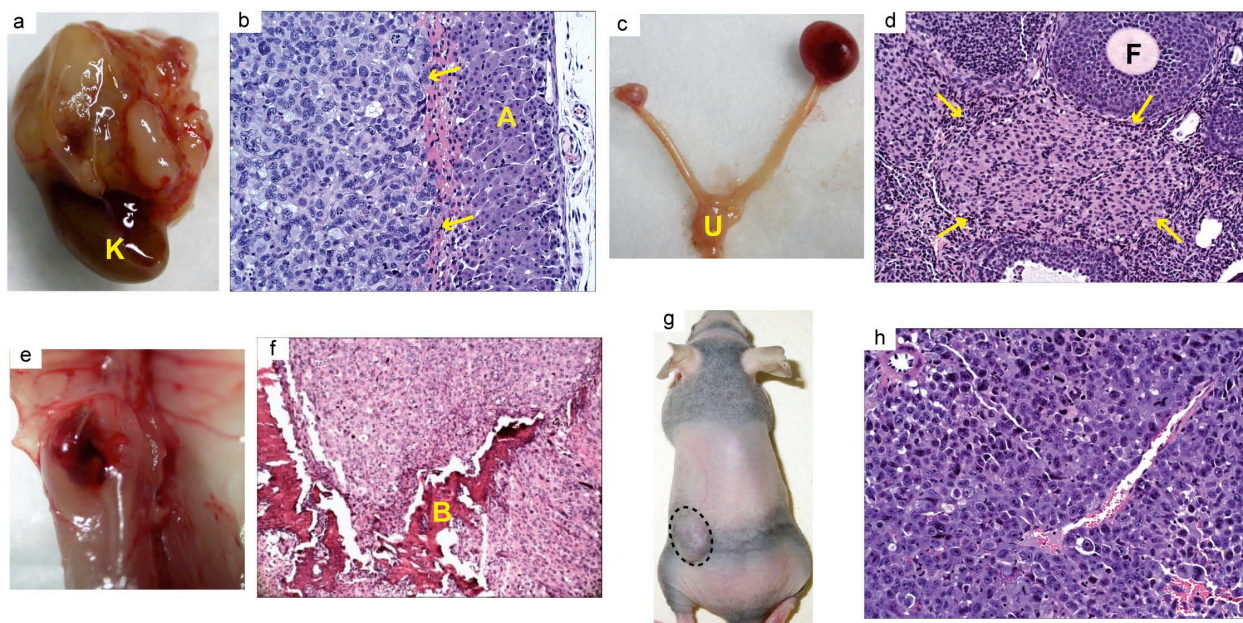

**Figure S3.** Establishing an *in vivo* metastasis model. Gross anatomy and histopathology of adrenal (a, b), ovarian (c, d), and vertebral (e, f) metastases (indicated by arrows), as well as tumor resulting from the subcutaneous injection of H1299 cells (g, h) respectively. K = kidney, A = adrenal tissue, U = uterus, F = ovarian follicle, B = vertebral bone.

## 5. Fluorescence response data

**Table S2.** Fluorescence response ( $I / I_0$ ) data set for the parental and organ-specific metastatic subline cell lysates using NP-GFP complexes (corresponding to Fig. 3a in the main text).

| Subline cells | Fluorescence response |       |       |       |       |       |       |       |
|---------------|-----------------------|-------|-------|-------|-------|-------|-------|-------|
|               | NP1                   | NP2   | NP3   | NP4   | NP5   | NP6   | NP7   | NP8   |
| Adrenal       | 6.130                 | 1.084 | 0.990 | 3.097 | 4.736 | 1.721 | 1.686 | 1.521 |
| Adrenal       | 6.760                 | 1.083 | 0.979 | 3.107 | 4.702 | 1.768 | 1.568 | 1.579 |
| Adrenal       | 5.680                 | 1.085 | 0.967 | 3.353 | 4.347 | 1.744 | 1.643 | 1.556 |
| Adrenal       | 6.699                 | 1.125 | 0.964 | 3.115 | 4.328 | 1.748 | 1.569 | 1.479 |
| Adrenal       | 6.909                 | 1.106 | 0.986 | 3.174 | 4.546 | 1.865 | 1.593 | 1.457 |
| Adrenal       | 6.331                 | 1.100 | 0.982 | 3.045 | 4.335 | 1.813 | 1.484 | 1.513 |
| Bone          | 6.439                 | 1.173 | 1.027 | 3.783 | 4.713 | 1.951 | 1.746 | 1.660 |
| Bone          | 5.769                 | 1.169 | 1.019 | 3.529 | 4.724 | 1.924 | 1.661 | 1.734 |
| Bone          | 6.452                 | 1.175 | 1.003 | 3.155 | 4.536 | 1.877 | 1.803 | 1.585 |
| Bone          | 6.625                 | 1.163 | 1.009 | 3.292 | 4.607 | 1.984 | 1.735 | 1.613 |
| Bone          | 5.948                 | 1.157 | 1.018 | 3.425 | 4.578 | 1.910 | 1.667 | 1.614 |
| Bone          | 6.502                 | 1.156 | 0.992 | 3.817 | 4.609 | 2.000 | 1.707 | 1.695 |
| Ovary         | 5.117                 | 1.127 | 1.024 | 3.034 | 3.919 | 1.778 | 1.587 | 1.600 |
| Ovary         | 5.335                 | 1.137 | 1.002 | 2.990 | 3.993 | 1.776 | 1.640 | 1.483 |
| Ovary         | 5.053                 | 1.149 | 1.029 | 2.954 | 4.042 | 1.780 | 1.654 | 1.577 |
| Ovary         | 5.332                 | 1.126 | 1.002 | 3.050 | 3.880 | 1.892 | 1.594 | 1.549 |
| Ovary         | 4.890                 | 1.122 | 1.040 | 2.857 | 4.080 | 1.751 | 1.602 | 1.453 |
| Ovary         | 4.695                 | 1.125 | 1.017 | 2.890 | 3.944 | 1.814 | 1.535 | 1.563 |
| Parental      | 5.590                 | 1.126 | 0.996 | 3.622 | 4.479 | 1.992 | 1.774 | 1.631 |
| Parental      | 5.618                 | 1.122 | 0.998 | 3.943 | 4.246 | 1.973 | 1.725 | 1.575 |
| Parental      | 5.884                 | 1.173 | 1.018 | 3.513 | 4.264 | 2.073 | 1.729 | 1.678 |
| Parental      | 5.550                 | 1.166 | 0.993 | 3.967 | 4.498 | 2.150 | 1.629 | 1.636 |

|                 |       |       |       |       |       |       |       |       |
|-----------------|-------|-------|-------|-------|-------|-------|-------|-------|
| <b>Parental</b> | 5.606 | 1.139 | 1.005 | 3.708 | 4.277 | 2.021 | 1.644 | 1.663 |
| <b>Parental</b> | 4.841 | 1.139 | 1.024 | 3.982 | 4.136 | 1.968 | 1.702 | 1.657 |

**Table S3.** Fluorescence response ( $I / I_0$ ) data set for the tumor tissue lysates using NP-GFP complexes (corresponding to Fig. 4a).

| <b>Tumor tissues</b> | <b>Fluorescence responses</b> |       |       |       |       |       |       |       |
|----------------------|-------------------------------|-------|-------|-------|-------|-------|-------|-------|
|                      | NP1                           | NP2   | NP3   | NP4   | NP5   | NP6   | NP7   | NP8   |
| <b>Bone</b>          | 5.535                         | 1.010 | 0.912 | 6.665 | 5.362 | 2.592 | 1.846 | 1.885 |
| <b>Bone</b>          | 5.976                         | 1.024 | 0.897 | 7.009 | 5.633 | 2.731 | 1.794 | 1.992 |
| <b>Bone</b>          | 5.731                         | 0.991 | 0.886 | 7.064 | 5.463 | 2.655 | 1.786 | 2.000 |
| <b>Bone</b>          | 5.535                         | 0.992 | 0.886 | 6.982 | 4.945 | 2.600 | 1.747 | 1.894 |
| <b>Bone</b>          | 5.346                         | 0.986 | 0.910 | 6.138 | 5.015 | 2.609 | 1.802 | 1.875 |
| <b>Bone</b>          | 5.435                         | 1.024 | 0.899 | 6.260 | 5.061 | 2.733 | 1.799 | 1.934 |
| <b>Subcutaneous</b>  | 6.723                         | 1.010 | 0.933 | 7.524 | 5.661 | 2.724 | 2.265 | 1.833 |
| <b>Subcutaneous</b>  | 7.060                         | 1.066 | 0.926 | 7.417 | 5.501 | 2.795 | 2.121 | 1.939 |
| <b>Subcutaneous</b>  | 6.819                         | 1.052 | 0.928 | 7.387 | 5.063 | 2.802 | 2.276 | 1.844 |
| <b>Subcutaneous</b>  | 6.645                         | 1.091 | 0.935 | 7.047 | 5.046 | 2.767 | 2.094 | 1.778 |
| <b>Subcutaneous</b>  | 6.470                         | 1.072 | 0.945 | 6.919 | 5.110 | 2.776 | 2.119 | 1.809 |
| <b>Subcutaneous</b>  | 6.894                         | 1.074 | 0.938 | 6.970 | 5.107 | 2.922 | 2.055 | 1.921 |
| <b>Adrenal</b>       | 6.554                         | 1.035 | 0.921 | 7.675 | 5.166 | 2.885 | 2.032 | 1.821 |
| <b>Adrenal</b>       | 6.509                         | 1.019 | 0.916 | 7.779 | 5.107 | 2.773 | 2.062 | 1.872 |
| <b>Adrenal</b>       | 6.200                         | 1.013 | 0.911 | 7.387 | 4.872 | 2.908 | 1.947 | 1.831 |
| <b>Adrenal</b>       | 6.119                         | 1.015 | 0.905 | 7.023 | 4.623 | 2.917 | 1.891 | 1.859 |
| <b>Adrenal</b>       | 6.379                         | 1.058 | 0.920 | 7.881 | 4.809 | 2.829 | 1.950 | 1.875 |
| <b>Adrenal</b>       | 6.440                         | 1.019 | 0.948 | 7.377 | 5.337 | 2.903 | 1.883 | 1.888 |
| <b>Ovary</b>         | 7.922                         | 1.045 | 0.987 | 9.303 | 6.377 | 3.397 | 2.109 | 1.712 |
| <b>Ovary</b>         | 7.998                         | 1.051 | 0.974 | 8.205 | 5.828 | 3.238 | 1.961 | 1.705 |
| <b>Ovary</b>         | 8.259                         | 1.033 | 1.020 | 8.322 | 5.390 | 3.080 | 1.991 | 1.744 |

|       |       |       |       |       |       |       |       |       |
|-------|-------|-------|-------|-------|-------|-------|-------|-------|
| Ovary | 8.062 | 1.027 | 1.009 | 8.378 | 5.853 | 3.085 | 1.919 | 1.722 |
| Ovary | 6.986 | 1.051 | 0.971 | 8.998 | 5.421 | 3.159 | 1.905 | 1.749 |
| Ovary | 8.351 | 1.035 | 0.994 | 9.560 | 5.942 | 3.026 | 1.940 | 1.787 |

**Table S4.** Fluorescence response ( $I / I_0$ ) data set for the normal tissue lysates using NP-GFP complexes (corresponding to Fig. 4a).

| Normal tissues | Fluorescence responses |       |       |       |       |       |       |       |
|----------------|------------------------|-------|-------|-------|-------|-------|-------|-------|
|                | NP1                    | NP2   | NP3   | NP4   | NP5   | NP6   | NP7   | NP8   |
| Adrenal        | 3.937                  | 1.255 | 0.983 | 3.35  | 5.426 | 2.096 | 1.666 | 1.383 |
| Adrenal        | 3.760                  | 1.106 | 0.973 | 3.120 | 4.712 | 2.115 | 1.694 | 1.361 |
| Adrenal        | 4.039                  | 1.007 | 0.969 | 3.052 | 6.016 | 2.027 | 1.677 | 1.388 |
| Adrenal        | 4.076                  | 1.102 | 0.957 | 2.947 | 4.920 | 2.146 | 1.775 | 1.365 |
| Adrenal        | 3.982                  | 1.156 | 0.964 | 3.183 | 5.871 | 2.120 | 1.805 | 1.388 |
| Adrenal        | 4.226                  | 1.061 | 0.998 | 3.179 | 5.797 | 2.020 | 1.790 | 1.402 |
| Lung           | 4.367                  | 1.030 | 0.989 | 3.209 | 6.372 | 2.871 | 1.871 | 1.282 |
| Lung           | 5.360                  | 1.081 | 0.980 | 3.382 | 6.074 | 2.831 | 1.881 | 1.304 |
| Lung           | 5.220                  | 1.130 | 0.975 | 3.243 | 5.823 | 2.794 | 1.869 | 1.286 |
| Lung           | 5.526                  | 1.060 | 1.007 | 3.256 | 6.355 | 3.012 | 1.909 | 1.252 |
| Lung           | 4.764                  | 1.099 | 0.992 | 3.694 | 6.600 | 2.902 | 1.843 | 1.358 |
| Lung           | 4.455                  | 1.042 | 0.994 | 3.395 | 5.811 | 2.877 | 1.881 | 1.369 |
| Ovary          | 5.723                  | 0.996 | 1.002 | 4.913 | 7.254 | 3.156 | 2.409 | 1.476 |
| Ovary          | 5.442                  | 1.072 | 0.996 | 5.868 | 7.145 | 3.238 | 2.214 | 1.478 |
| Ovary          | 6.153                  | 1.037 | 1.011 | 5.144 | 6.854 | 3.196 | 2.169 | 1.538 |
| Ovary          | 5.880                  | 1.161 | 0.982 | 5.059 | 6.975 | 3.080 | 2.190 | 1.585 |
| Ovary          | 5.848                  | 1.108 | 0.988 | 5.626 | 6.649 | 3.145 | 2.102 | 1.528 |
| Ovary          | 6.032                  | 1.025 | 1.006 | 5.195 | 6.691 | 3.268 | 2.014 | 1.506 |
| Skin           | 4.427                  | 1.077 | 0.981 | 3.984 | 6.964 | 2.894 | 2.113 | 1.466 |
| Skin           | 4.370                  | 1.080 | 1.039 | 3.944 | 7.139 | 2.989 | 2.054 | 1.420 |

|             |       |       |       |       |       |       |       |       |
|-------------|-------|-------|-------|-------|-------|-------|-------|-------|
| <b>Skin</b> | 4.510 | 1.053 | 1.073 | 3.964 | 6.424 | 2.841 | 1.910 | 1.443 |
| <b>Skin</b> | 4.535 | 1.062 | 1.034 | 3.761 | 6.113 | 2.850 | 2.051 | 1.470 |
| <b>Skin</b> | 4.572 | 1.047 | 0.993 | 3.908 | 6.024 | 3.122 | 1.940 | 1.662 |
| <b>Skin</b> | 4.339 | 1.077 | 0.976 | 3.774 | 6.572 | 2.800 | 1.922 | 1.614 |

## 6. Description of linear discriminant analysis

Linear discriminant analysis (LDA), a supervised multivariate method, is used to separate classes of objects or assign new objects to appropriate classes. The analysis generates a new space given by the canonical discriminant **factors** (also called canonical functions or discriminant axes), which describes best similarities and differences between groups under consideration. In the discriminant score plot each response pattern generated can be reduced to a single score and plotted in the new discriminant space. The discriminants are linear combinations of the measured (independent) variables such as the sensor responses. Discriminant functions (also called canonical functions for multiple group case) are calculated with the objective of maximizing the distance between classes relative to the variation within classes. The first discriminant is the linear combination of the variables that best discriminates among the groups; the second discriminant is orthogonal to the first and is the next best combination of variables, and so on. First discriminant function:

$$L_{DF} = c + a_1x_1 + a_2x_2 + \dots + a_nx_n$$

where,  $a_1$  through  $a_n$  are discriminant coefficients,  $x_1$  through  $x_n$  are discriminating variables, and  $c$  is a constant. The coefficients for each variable in each discriminant function can be interpreted as: the larger the standardized coefficient, the greater is the contribution of the respective variable to the discrimination between groups. Computationally, a canonical correlation analysis determines the successive functions and canonical *roots* (the term root refers to the eigenvalues that are associated with the respective canonical function). The maximum number of functions will be equal to the number of groups minus one, or the number of variables in the analysis, whichever is smaller.

The different statistical terms are described using the parameters obtained for data in Table 1.



Below is the data input section in the software, SYSTAT:

| Grouping variable |            | Independent variables (Predictors) |          |          |          |          |          |          |          |
|-------------------|------------|------------------------------------|----------|----------|----------|----------|----------|----------|----------|
|                   |            | NP1                                | NP2      | NP3      | NP4      | NP5      | NP6      | NP7      | NP8      |
|                   | VAR00001\$ | VAR00002                           | VAR00003 | VAR00004 | VAR00005 | VAR00006 | VAR00007 | VAR00008 | VAR00009 |
| 1                 | Adrenal    | 6.130                              | 1.084    | 0.990    | 3.097    | 4.736    | 1.721    | 1.686    | 1.521    |
| 2                 | Adrenal    | 6.760                              | 1.083    | 0.979    | 3.107    | 4.702    | 1.768    | 1.568    | 1.579    |
| 3                 | Adrenal    | 5.680                              | 1.085    | 0.967    | 3.353    | 4.347    | 1.744    | 1.643    | 1.556    |
| 4                 | Adrenal    | 6.699                              | 1.125    | 0.964    | 3.115    | 4.328    | 1.748    | 1.569    | 1.479    |
| 5                 | Adrenal    | 6.909                              | 1.106    | 0.986    | 3.174    | 4.546    | 1.865    | 1.593    | 1.457    |
| 6                 | Adrenal    | 6.331                              | 1.100    | 0.982    | 3.045    | 4.335    | 1.813    | 1.484    | 1.513    |
| 7                 | Bone       | 6.439                              | 1.173    | 1.027    | 3.783    | 4.713    | 1.951    | 1.746    | 1.660    |
| 8                 | Bone       | 5.769                              | 1.169    | 1.019    | 3.529    | 4.724    | 1.924    | 1.661    | 1.734    |
| 9                 | Bone       | 6.452                              | 1.175    | 1.003    | 3.155    | 4.536    | 1.877    | 1.803    | 1.585    |
| 10                | Bone       | 6.625                              | 1.163    | 1.009    | 3.292    | 4.607    | 1.984    | 1.735    | 1.613    |
| 11                | Bone       | 5.948                              | 1.157    | 1.018    | 3.425    | 4.578    | 1.910    | 1.667    | 1.614    |
| 12                | Bone       | 6.502                              | 1.156    | 0.992    | 3.817    | 4.609    | 2.000    | 1.707    | 1.695    |
| 13                | Ovary      | 5.117                              | 1.127    | 1.024    | 3.034    | 3.919    | 1.778    | 1.587    | 1.600    |
| 14                | Ovary      | 5.335                              | 1.137    | 1.002    | 2.990    | 3.993    | 1.776    | 1.640    | 1.483    |
| 15                | Ovary      | 5.053                              | 1.149    | 1.029    | 2.954    | 4.042    | 1.780    | 1.654    | 1.577    |
| 16                | Ovary      | 5.332                              | 1.126    | 1.002    | 3.050    | 3.880    | 1.892    | 1.594    | 1.549    |
| 17                | Ovary      | 4.890                              | 1.122    | 1.040    | 2.857    | 4.080    | 1.751    | 1.602    | 1.453    |
| 18                | Ovary      | 4.695                              | 1.125    | 1.017    | 2.890    | 3.944    | 1.814    | 1.535    | 1.563    |
| 19                | Parental   | 5.590                              | 1.126    | 0.996    | 3.622    | 4.479    | 1.992    | 1.774    | 1.631    |
| 20                | Parental   | 5.618                              | 1.122    | 0.998    | 3.943    | 4.246    | 1.973    | 1.725    | 1.575    |
| 21                | Parental   | 5.884                              | 1.173    | 1.018    | 3.513    | 4.264    | 2.073    | 1.729    | 1.678    |
| 22                | Parental   | 5.550                              | 1.166    | 0.993    | 3.967    | 4.498    | 2.150    | 1.629    | 1.636    |
| 23                | Parental   | 5.606                              | 1.139    | 1.005    | 3.708    | 4.277    | 2.021    | 1.644    | 1.663    |
| 24                | Parental   | 4.841                              | 1.139    | 1.024    | 3.982    | 4.136    | 1.968    | 1.702    | 1.657    |

The important statistical outputs are as follows:

Group frequencies

| Adrenal | Bone | Ovary | Parental |
|---------|------|-------|----------|
| 6       | 6    | 6     | 6        |

Group means

|          | Adrenal | Bone  | Ovary | Parental |
|----------|---------|-------|-------|----------|
| VAR00002 | 6.418   | 6.289 | 5.070 | 5.515    |
| VAR00003 | 1.097   | 1.166 | 1.131 | 1.144    |
| VAR00004 | 0.978   | 1.011 | 1.019 | 1.006    |
| VAR00005 | 3.148   | 3.500 | 2.962 | 3.789    |
| VAR00006 | 4.499   | 4.628 | 3.976 | 4.317    |
| VAR00007 | 1.776   | 1.941 | 1.798 | 2.030    |
| VAR00008 | 1.591   | 1.720 | 1.602 | 1.701    |
| VAR00009 | 1.518   | 1.650 | 1.537 | 1.640    |

Classification functions

|          | Adrenal   | Bone      | Ovary     | Parental  |
|----------|-----------|-----------|-----------|-----------|
| CONSTANT | -8333.996 | -9310.458 | -8721.498 | -9249.783 |

|          |          |          |          |          |
|----------|----------|----------|----------|----------|
| VAR00002 | 37.136   | 28.559   | 19.594   | 17.413   |
| VAR00003 | 4523.237 | 4823.019 | 4610.813 | 4650.215 |
| VAR00004 | 6967.687 | 7212.380 | 7245.597 | 7268.904 |
| VAR00005 | 218.819  | 228.673  | 205.273  | 227.559  |
| VAR00006 | 53.271   | 49.848   | 14.405   | 25.213   |
| VAR00007 | 705.366  | 806.622  | 820.732  | 916.694  |
| VAR00008 | 1094.119 | 1206.462 | 1171.652 | 1255.724 |
| VAR00009 | 479.127  | 515.166  | 472.138  | 490.321  |

Jackknifed classification matrix

|          | Adrenal | Bone | Ovary | Parental | %correct |
|----------|---------|------|-------|----------|----------|
| Adrenal  | 6       | 0    | 0     | 0        | 100      |
| Bone     | 0       | 6    | 0     | 0        | 100      |
| Ovary    | 0       | 0    | 6     | 0        | 100      |
| Parental | 0       | 0    | 0     | 6        | 100      |
| Total    | 6       | 6    | 6     | 6        | 100      |

The Jackknifed classification shows no overlap between the groups at all, and all the cases are classified with 100% classification accuracy.

Eigenvalues

|        |       |       |
|--------|-------|-------|
| 18.250 | 9.035 | 2.077 |
|--------|-------|-------|

The Eigenvalues or roots are noteworthy. The first eigenvalue (18.250) is very large relative to the second, indicating that the first canonical function (or the Factor (1) in the LDA figures) captures most of the difference among the groups. Also, it indicates that three discriminants are derived for classification of the groups.

Cumulative proportion of total dispersion

|       |       |       |
|-------|-------|-------|
| 0.622 | 0.929 | 1.000 |
|-------|-------|-------|

The contribution from for each factor towards the total classification is computed from the above result, where the first term corresponds to Factor (1), second term corresponds to Factor (1)+Factor (2), and the third is the combination of all three. It is clear that the factors have contribution of 62.2%, 30.7%, and 7.1% for Factor (1), Factor (2), and Factor (3) respectively.

## Canonical Scores Plot

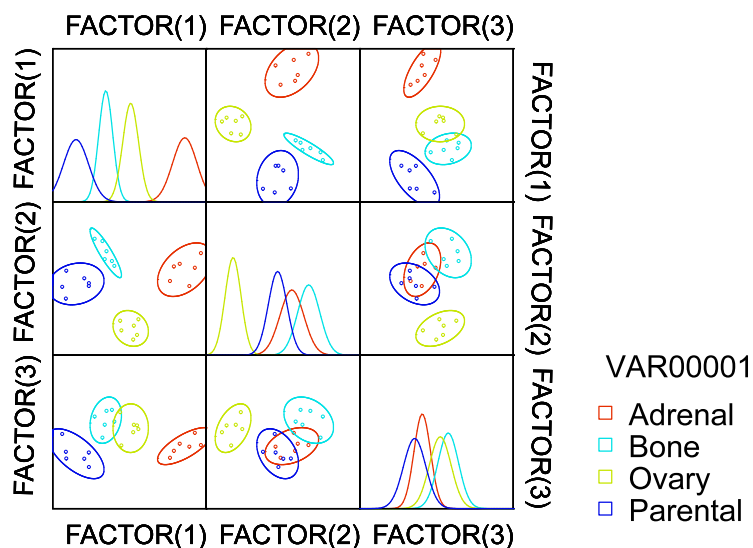

The scores corresponding to each factor are then plotted as scatter plot with a certain confidence ellipse.

### Jackknifed classification:

The Jackknifed classification (leave-one-out cross-validation) is used to test the predictability of the sensor array by leaving one observation out of the set at the time, and uses the rest of the data as a training set to generate the linear discriminant (LD) function. The LD function is then used to place the excluded observation (data point) within the correct cluster. This is performed for each observation, and the overall ability to classify the observations describes the quality and predictability of the array.

The results from the Jackknifed analysis are listed below (Table S5 – S8). The classification matrices indicate the differential binding of the NPs with the lysates and the contributions of the NPs in discrimination. It should be noted that the minimum number of sensor element varies from 3 (metastatic cells) to 6 (metastatic tissues) depending on the analyte contents. Increasing the number of sensors, however, increases the robustness of the sensor system. It should be noted that based on the percent accuracy of identification by a particular set, the next optimal set with

higher classification accuracy is determined. In order to have a general set of sensors, we reported the result from the Jackknifed analysis with a common set of sensor elements (NP1 to NP8).

## 7. Jackknifed analyses of the fluorescence responses

**Table S5.** Percent accuracy of classification of the *metastatic cells* using Jackknifed analysis (leave-one-out validation) using a NP or combinations.

| NP1 | NP2 | NP3 | NP4 | NP5 | NP6 | NP7 | NP8 | Classification Accuracy, % |
|-----|-----|-----|-----|-----|-----|-----|-----|----------------------------|
| ■   |     |     |     |     |     |     |     | 50                         |
|     | ■   |     |     |     |     |     |     | 75                         |
|     |     | ■   |     |     |     |     |     | 63                         |
|     |     |     | ■   |     |     |     |     | 63                         |
|     |     |     |     | ■   |     |     |     | 63                         |
|     |     |     |     |     | ■   |     |     | 54                         |
|     |     |     |     |     |     | ■   |     | 42                         |
|     |     |     |     |     |     |     | ■   | 46                         |
| ■   | ■   |     |     |     |     |     |     | 71                         |
|     | ■   | ■   |     |     |     |     |     | 67                         |
|     |     | ■   | ■   |     |     |     |     | 83                         |
|     |     |     | ■   | ■   |     |     |     | 79                         |
|     |     |     |     | ■   | ■   |     |     | 83                         |
|     |     |     |     |     | ■   | ■   |     | 75                         |
|     |     |     |     |     |     | ■   | ■   | 67                         |
| ■   | ■   | ■   | ■   |     |     |     |     | 88                         |
|     | ■   | ■   | ■   | ■   |     |     |     | 88                         |
|     |     | ■   | ■   | ■   | ■   |     |     | 88                         |
|     |     |     | ■   | ■   | ■   | ■   |     | 83                         |
|     |     |     |     | ■   | ■   | ■   | ■   | 83                         |
|     |     |     |     |     | ■   | ■   | ■   | 79                         |
| ■   | ■   | ■   |     |     | ■   |     |     | 100                        |
|     | ■   | ■   |     |     | ■   | ■   |     | 83                         |
|     |     | ■   | ■   |     | ■   | ■   |     | 96                         |
|     |     |     | ■   | ■   | ■   | ■   |     | 83                         |
|     |     |     |     | ■   | ■   | ■   | ■   | 79                         |
| ■   | ■   | ■   |     |     | ■   |     |     | 96                         |
|     |     | ■   | ■   |     | ■   |     |     | 100                        |
|     |     |     | ■   | ■   | ■   |     |     | 100                        |



|  |     |
|--|-----|
|  | 92  |
|  | 83  |
|  | 92  |
|  | 92  |
|  | 92  |
|  | 96  |
|  | 96  |
|  | 100 |
|  | 96  |
|  | 100 |
|  | 100 |

**Table S7.** Percent accuracy of classification of the *normal tissues* using Jackknifed analysis (leave-one-out validation) using a NP or combinations.

| NP1 | NP2 | NP3 | NP4 | NP5 | NP6 | NP7 | NP8 | Classification Accuracy, % |
|-----|-----|-----|-----|-----|-----|-----|-----|----------------------------|
|     |     |     |     |     |     |     |     | 79                         |
|     |     |     |     |     |     |     |     | 21                         |
|     |     |     |     |     |     |     |     | 46                         |
|     |     |     |     |     |     |     |     | 79                         |
|     |     |     |     |     |     |     |     | 42                         |
|     |     |     |     |     |     |     |     | 71                         |
|     |     |     |     |     |     |     |     | 79                         |
|     |     |     |     |     |     |     |     | 50                         |
|     |     |     |     |     |     |     |     | 75                         |
|     |     |     |     |     |     |     |     | 67                         |
|     |     |     |     |     |     |     |     | 92                         |
|     |     |     |     |     |     |     |     | 79                         |
|     |     |     |     |     |     |     |     | 88                         |
|     |     |     |     |     |     |     |     | 92                         |
|     |     |     |     |     |     |     |     | 88                         |
|     |     |     |     |     |     |     |     | 88                         |
|     |     |     |     |     |     |     |     | 92                         |
|     |     |     |     |     |     |     |     | 92                         |
|     |     |     |     |     |     |     |     | 96                         |
|     |     |     |     |     |     |     |     | 96                         |
|     |     |     |     |     |     |     |     | 92                         |
|     |     |     |     |     |     |     |     | 92                         |
|     |     |     |     |     |     |     |     | 88                         |

|  |     |
|--|-----|
|  | 92  |
|  | 100 |
|  | 100 |
|  | 100 |

**Table S8.** Percent accuracy of classification of the *normal* and *metastatic tissues* using Jackknifed analysis (leave-one-out validation) using a NP or combinations.

| NP1 | NP2 | NP3 | NP4 | NP5 | NP6 | NP7 | NP8 | Classification Accuracy, % |
|-----|-----|-----|-----|-----|-----|-----|-----|----------------------------|
|     |     |     |     |     |     |     |     | 71                         |
|     |     |     |     |     |     |     |     | 29                         |
|     |     |     |     |     |     |     |     | 50                         |
|     |     |     |     |     |     |     |     | 67                         |
|     |     |     |     |     |     |     |     | 29                         |
|     |     |     |     |     |     |     |     | 42                         |
|     |     |     |     |     |     |     |     | 46                         |
|     |     |     |     |     |     |     |     | 52                         |
|     |     |     |     |     |     |     |     | 73                         |
|     |     |     |     |     |     |     |     | 77                         |
|     |     |     |     |     |     |     |     | 90                         |
|     |     |     |     |     |     |     |     | 77                         |
|     |     |     |     |     |     |     |     | 88                         |
|     |     |     |     |     |     |     |     | 85                         |
|     |     |     |     |     |     |     |     | 88                         |
|     |     |     |     |     |     |     |     | 88                         |
|     |     |     |     |     |     |     |     | 90                         |
|     |     |     |     |     |     |     |     | 90                         |
|     |     |     |     |     |     |     |     | 94                         |
|     |     |     |     |     |     |     |     | 96                         |
|     |     |     |     |     |     |     |     | 94                         |
|     |     |     |     |     |     |     |     | 96                         |
|     |     |     |     |     |     |     |     | 94                         |
|     |     |     |     |     |     |     |     | 94                         |
|     |     |     |     |     |     |     |     | 98                         |
|     |     |     |     |     |     |     |     | 98                         |
|     |     |     |     |     |     |     |     | 96                         |
|     |     |     |     |     |     |     |     | 96                         |
|     |     |     |     |     |     |     |     | 94                         |
|     |     |     |     |     |     |     |     | 98                         |
|     |     |     |     |     |     |     |     | 98                         |

|  |     |
|--|-----|
|  | 98  |
|  | 98  |
|  | 100 |
|  | 100 |
|  | 98  |
|  | 100 |

## 8. Identification of unknown samples

**Table S9.** Fluorescence response ( $I / I_0$ ) data set for identification of unknown tumor tissue lysates selected from the training set (Figure 4) using NP-GFP complexes.

| #  | Fluorescence responses |       |       |       |       |       |       |       | Identified as | Verification |
|----|------------------------|-------|-------|-------|-------|-------|-------|-------|---------------|--------------|
|    | NP1                    | NP2   | NP3   | NP4   | NP5   | NP6   | NP7   | NP8   |               |              |
| 1  | 8.030                  | 1.066 | 1.029 | 7.860 | 5.846 | 2.523 | 2.153 | 1.322 | Ovary         | Ovary        |
| 2  | 7.601                  | 1.054 | 1.031 | 8.536 | 6.127 | 2.296 | 2.570 | 1.283 | Ovary         | Ovary        |
| 3  | 6.501                  | 1.068 | 0.940 | 7.779 | 4.800 | 2.965 | 1.863 | 1.780 | Adrenal       | Adrenal      |
| 4  | 5.901                  | 1.045 | 0.997 | 4.431 | 5.714 | 2.293 | 2.863 | 1.592 | Subcutaneous  | Subcutaneous |
| 5  | 5.379                  | 1.056 | 0.936 | 5.161 | 5.426 | 2.326 | 3.124 | 1.538 | Subcutaneous  | Subcutaneous |
| 6  | 5.431                  | 1.047 | 0.931 | 6.143 | 4.849 | 2.055 | 1.766 | 1.706 | Bone          | Bone         |
| 7  | 5.498                  | 1.077 | 0.953 | 7.444 | 5.842 | 2.665 | 2.890 | 1.699 | Subcutaneous  | Subcutaneous |
| 8  | 6.322                  | 1.097 | 0.962 | 7.221 | 4.982 | 2.657 | 1.921 | 1.697 | Adrenal       | Adrenal      |
| 9  | 6.582                  | 1.266 | 0.929 | 7.182 | 5.023 | 2.443 | 1.906 | 1.780 | Adrenal       | Subcutaneous |
| 10 | 5.143                  | 1.028 | 0.900 | 6.091 | 4.313 | 2.072 | 1.570 | 1.709 | Bone          | Bone         |
| 11 | 4.836                  | 1.112 | 0.928 | 5.708 | 5.167 | 2.583 | 1.627 | 1.863 | Bone          | Bone         |
| 12 | 5.632                  | 0.975 | 0.915 | 6.145 | 4.124 | 2.274 | 1.474 | 1.597 | Bone          | Bone         |
| 13 | 7.208                  | 1.071 | 0.950 | 7.694 | 6.630 | 2.195 | 2.285 | 1.330 | Ovary         | Ovary        |
| 14 | 8.357                  | 1.084 | 0.986 | 7.848 | 5.727 | 2.251 | 2.085 | 1.360 | Ovary         | Ovary        |
| 15 | 5.557                  | 1.124 | 0.928 | 5.611 | 4.731 | 2.097 | 2.689 | 1.836 | Subcutaneous  | Subcutaneous |



|    |       |       |       |       |       |       |       |       |              |              |
|----|-------|-------|-------|-------|-------|-------|-------|-------|--------------|--------------|
| 16 | 7.543 | 1.108 | 0.952 | 5.065 | 5.400 | 2.219 | 2.709 | 1.661 | Subcutaneous | Subcutaneous |
| 17 | 6.697 | 1.104 | 0.967 | 5.485 | 4.538 | 2.095 | 2.880 | 1.746 | Subcutaneous | Subcutaneous |
| 18 | 6.101 | 1.109 | 0.946 | 7.626 | 5.004 | 2.772 | 1.858 | 1.750 | Adrenal      | Adrenal      |
| 19 | 6.594 | 1.061 | 0.923 | 7.732 | 4.786 | 2.708 | 1.964 | 1.758 | Adrenal      | Adrenal      |
| 20 | 5.414 | 1.087 | 0.958 | 4.276 | 4.397 | 2.962 | 2.563 | 1.507 | Subcutaneous | Subcutaneous |
| 21 | 6.724 | 1.104 | 0.948 | 3.801 | 4.321 | 2.369 | 2.643 | 1.583 | Subcutaneous | Subcutaneous |
| 22 | 5.217 | 1.021 | 0.916 | 6.003 | 3.995 | 2.165 | 1.508 | 1.602 | Bone         | Bone         |
| 23 | 5.369 | 1.155 | 0.968 | 5.138 | 4.413 | 1.657 | 1.496 | 1.758 | Bone         | None         |
| 24 | 8.144 | 1.182 | 0.960 | 7.565 | 6.091 | 2.824 | 2.738 | 1.358 | Ovary        | Ovary        |
| 25 | 5.647 | 1.094 | 0.982 | 7.913 | 5.202 | 2.112 | 2.195 | 1.464 | Adrenal      | Adrenal      |
| 26 | 7.153 | 1.086 | 0.951 | 7.885 | 5.313 | 2.158 | 2.121 | 1.712 | Adrenal      | Adrenal      |
| 27 | 8.034 | 1.117 | 1.002 | 7.180 | 5.297 | 2.210 | 2.040 | 1.520 | Ovary        | Ovary        |
| 28 | 6.192 | 1.086 | 1.003 | 7.235 | 5.126 | 2.657 | 1.970 | 1.630 | Adrenal      | Adrenal      |
| 29 | 6.648 | 1.084 | 0.968 | 7.769 | 4.932 | 2.354 | 1.833 | 1.719 | Adrenal      | Adrenal      |
| 30 | 5.875 | 1.174 | 0.940 | 7.628 | 5.003 | 2.286 | 1.991 | 1.717 | Adrenal      | Adrenal      |
| 31 | 5.312 | 1.057 | 0.938 | 5.687 | 4.426 | 1.886 | 1.532 | 1.749 | Bone         | Bone         |
| 32 | 5.415 | 1.023 | 0.969 | 6.571 | 4.525 | 1.715 | 1.431 | 1.783 | Bone         | Bone         |

## 9. Three-dimensional LDA plot for normal and tumor tissues

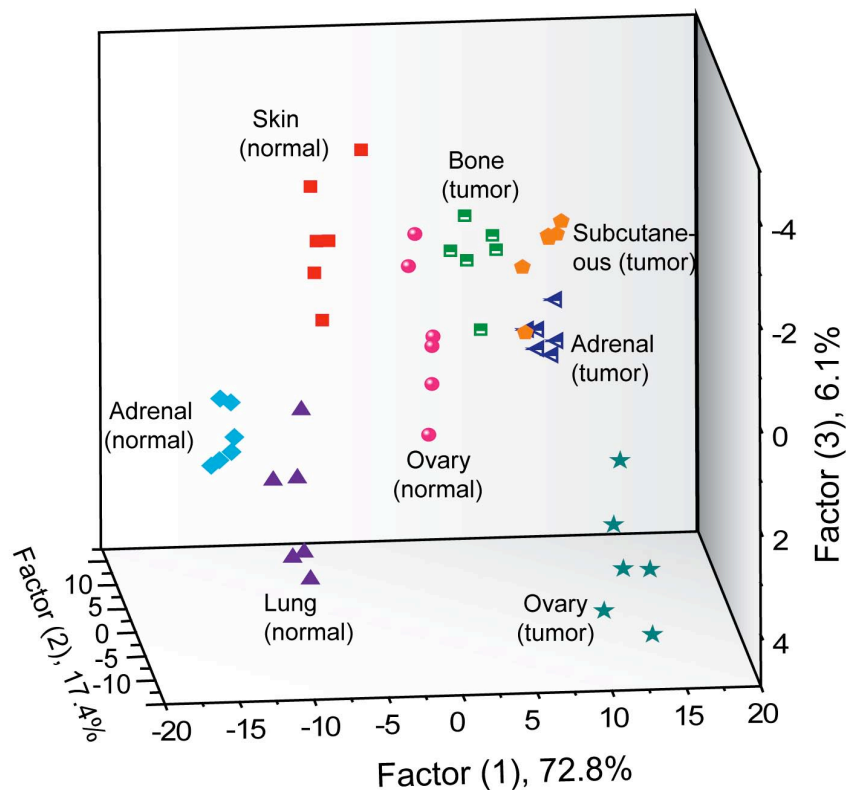

**Figure S4.** A 3-Dimensional LDA plot of the combined fluorescence response patterns of tumor and healthy tissues including the three most significant variances amongst the seven, with 95% confidence ellipses.

## References

1. Miranda, O. R.; Chen, H.; You, C.; Mortenson, D. E.; Yang, X.; Bunz, U. H. F.; Rotello, V. M. Enzyme-Amplified Array Sensing of Proteins in Solution and in Biofluids. *J. Am. Chem. Soc.* **2010**, *132*, 5285-5289.
2. Brust, M.; Walker, M.; Bethell, D.; Schiffrin, D. J.; Whyman, R. Synthesis of Thiol-Derivatised Gold Nanoparticles in a Two-Phase Liquid-Liquid System. *J. Chem. Soc. – Chem. Comm.* **1994**, 801.

- 
3. Hostetler, M. J.; Templeton, A. C.; Murray, R. W. Dynamics of Place-Exchange Reactions on Monolayer-Protected Gold Cluster Molecules. *Langmuir* **1999**, *15*, 3782-3789.
  4. Yan, B.; Zhu, Z. J.; Miranda, O. R.; Chompoosor, A.; Rotello, V. M.; Vachet, R. W. Laser Desorption/Ionization Mass Spectrometry Analysis of Monolayer-Protected Gold Nanoparticles. *Anal. Bioanal. Chem.* **2010**, *396*, 1025-1035.
  5. De, M.; Rana, S.; Rotello, V. M. Nickel-Ion-Mediated Control of the Stoichiometry of His-Tagged Protein/Nanoparticle Interactions. *Macromol. Biosci.* **2009**, *9*, 174-178.
